# Supplementary material for: Li7Ba3Al3O11: a new supertetrahedral oxide
Source: Royal Society of Chemistry journal article supplement (doi:10.1039/d1dt02606b), 2021-01-01
Supplement: d1dt02606b1.pdf [file d1dt02606b1.pdf]

**Electronic Supplementary Information (ESI)**

**Li<sub>7</sub>Ba<sub>3</sub>Al<sub>3</sub>O<sub>11</sub>: A new super-tetrahedral oxide**

**Yuki Nishita,<sup>a,b</sup> Hisanori Yamane<sup>\*a</sup>**

*<sup>a</sup> Institute of Multidisciplinary Research for Advanced Materials, Tohoku University,*

*2-1-1 Katahira, Aoba-ku, Sendai 980-8577, Japan;*

*<sup>b</sup> Department of Metallurgy, Materials Science and Materials Processing, Graduate School of Engineering, Tohoku University,*

*6-6-04 Aramaki, Aza Aoba, Aoba-ku, Sendai 980-8579, Japan*

\*Correspondence: [hisanori.yamane.a1@tohoku.ac.jp](mailto:hisanori.yamane.a1@tohoku.ac.jp)

**Table S1** Site occupancies, atomic coordinates and equivalent isotropic displacement parameters ( $U_{eq}$ ) for Li<sub>7</sub>Ba<sub>3</sub>Al<sub>3</sub>O<sub>11</sub>.

**Table S2** Anisotropic displacement parameters ( $U_{ij} / \text{Å}^2$ ) for Li<sub>7</sub>Ba<sub>3</sub>Al<sub>3</sub>O<sub>11</sub>

**Table S3** Selected inter atomic distances (Å) for Li<sub>7</sub>Ba<sub>3</sub>Al<sub>3</sub>O<sub>11</sub>

**Table S4** Crystallographic data of Li<sub>7</sub>Ba<sub>3</sub>Al<sub>3</sub>O<sub>11</sub> derived from Rietveld refinement of powder XRD data

**Table S5** Site occupancies, atomic coordinates and isotropic displacement parameters ( $U_{iso}$ ) refined by Rietveld analysis for the powder XRD pattern of Li<sub>7</sub>Ba<sub>3</sub>Al<sub>3</sub>O<sub>11</sub>

**Fig. S1** Current versus time measured with Ni plate electrodes (0.1 mm thick) under an applied voltage of 5V for the polycrystalline sample of Li<sub>7</sub>Ba<sub>3</sub>Al<sub>3</sub>O<sub>11</sub> in an Ar-filled glove box at 673 K.

**Table S1** Site occupancies, atomic coordinates and equivalent isotropic displacement parameters ( $U_{\text{eq}}$ ) for  $\text{Li}_7\text{Ba}_3\text{Al}_3\text{O}_{11}$ 

| Atom    | Wyckoff site | Occ.           | $x$         | $y$         | $z$         | $U_{\text{eq}}^*$ |
|---------|--------------|----------------|-------------|-------------|-------------|-------------------|
| Ba1     | 8 <i>m</i>   | 1              | 0.20763(2)  | 0.50229(2)  | 0.50110(2)  | 0.00920(4)        |
| Ba2     | 8 <i>m</i>   | 1              | 0.00223(2)  | 0.29239(2)  | 0.50132(2)  | 0.00924(4)        |
| Ba3     | 8 <i>m</i>   | 1              | 0.00113(2)  | 0.00139(2)  | 0.20777(2)  | 0.00919(4)        |
| Li1     | 8 <i>m</i>   | 1              | 0.5888(6)   | 0.0968(6)   | 0.0925(5)   | 0.0139(15)        |
| Li2     | 8 <i>m</i>   | 1              | 0.4040(5)   | 0.0915(6)   | 0.0897(5)   | 0.0134(15)        |
| Li3     | 8 <i>m</i>   | 1              | 0.0939(5)   | 0.0880(5)   | 0.5954(5)   | 0.0124(15)        |
| Li4     | 8 <i>m</i>   | 1              | 0.0913(6)   | 0.5937(6)   | 0.0928(6)   | 0.0158(16)        |
| Li/Al5  | 4 <i>l</i>   | 0.532(7)/0.468 | 1/4         | 3/4         | 0.5881(2)   | 0.0101(8)         |
| Li/Al6  | 4 <i>l</i>   | 0.478(6)/0.522 | 1/4         | 3/4         | 0.0881(2)   | 0.0075(7)         |
| Li/Al7  | 4 <i>k</i>   | 0.152(6)/0.848 | 1/4         | 1/4         | 0.58603(14) | 0.0072(5)         |
| Li/Al8  | 4 <i>k</i>   | 0.857(7)/0.143 | 1/4         | 1/4         | 0.0955(4)   | 0.0091(14)        |
| Li/Al9  | 4 <i>j</i>   | 0.977(7)/0.023 | 3/4         | 0.6042(7)   | 1/4         | 0.020(3)          |
| Al10    | 4 <i>j</i>   | 1              | 3/4         | 0.08523(12) | 1/4         | 0.0063(3)         |
| Li/Al11 | 4 <i>i</i>   | 0.404(6)/0.596 | 1/4         | 0.58692(18) | 1/4         | 0.0059(6)         |
| Li/Al12 | 4 <i>i</i>   | 0.614(7)/0.386 | 1/4         | 0.0887(3)   | 1/4         | 0.0115(9)         |
| Li/Al13 | 4 <i>h</i>   | 0.646(7)/0.354 | 0.5896(3)   | 1/4         | 3/4         | 0.0121(9)         |
| Li/Al14 | 4 <i>h</i>   | 0.358(6)/0.642 | 0.08672(18) | 1/4         | 3/4         | 0.0072(6)         |
| Li/Al15 | 4 <i>g</i>   | 0.947(7)/0.053 | 0.6018(7)   | 1/4         | 1/4         | 0.019(2)          |
| Li/Al16 | 4 <i>g</i>   | 0.034(6)/0.966 | 0.08528(12) | 1/4         | 1/4         | 0.0060(4)         |
| O1      | 8 <i>m</i>   | 1              | 0.6726(2)   | 0.1547(2)   | 0.3355(2)   | 0.0187(7)         |
| O2      | 8 <i>m</i>   | 1              | 0.67166(19) | 0.0060(2)   | 0.17565(19) | 0.0090(5)         |
| O3      | 8 <i>m</i>   | 1              | 0.3324(3)   | 0.6613(3)   | 0.1638(3)   | 0.0284(8)         |
| O4      | 8 <i>m</i>   | 1              | 0.3246(2)   | -0.0020(2)  | 0.1717(2)   | 0.0121(6)         |
| O5      | 8 <i>m</i>   | 1              | 0.16956(17) | 0.67823(17) | 0.0008(2)   | 0.0119(5)         |
| O6      | 8 <i>m</i>   | 1              | 0.17810(17) | 0.16959(17) | 0.5045(2)   | 0.0104(5)         |
| O7      | 8 <i>m</i>   | 1              | 0.1612(3)   | 0.3262(2)   | 0.6580(2)   | 0.0219(7)         |
| O8      | 8 <i>m</i>   | 1              | 0.1550(3)   | 0.1662(3)   | 0.1706(2)   | 0.0229(8)         |
| O9      | 8 <i>m</i>   | 1              | 0.0059(2)   | 0.32381(18) | 0.17144(18) | 0.0098(5)         |
| O10     | 8 <i>m</i>   | 1              | -0.0019(2)  | 0.67109(18) | 0.17627(18) | 0.0110(5)         |
| O11     | 4 <i>f</i>   | 1              | 0           | 0           | 0           | 0.0108(5)         |
| O12     | 4 <i>e</i>   | 1              | 1/2         | 1/2         | 1/2         | 0.0091(5)         |

$$* U_{\text{eq}} = (\sum_i \sum_j U_{ij} a_i^* a_j^* a_i \cdot a_j) / 3$$

**Table S2** Anisotropic displacement parameters ( $U_{ij} / \text{\AA}^2$ ) for  $\text{Li}_7\text{Ba}_3\text{Al}_3\text{O}_{11}$ 

| Atom    | $U_{11}$   | $U_{22}$   | $U_{33}$   | $U_{12}$    | $U_{13}$    | $U_{23}$    |
|---------|------------|------------|------------|-------------|-------------|-------------|
| Ba1     | 0.00645(7) | 0.01051(8) | 0.01064(7) | 0.00039(7)  | 0.00021(10) | -0.00037(8) |
| Ba2     | 0.01010(8) | 0.00692(7) | 0.01071(8) | -0.00061(7) | -0.00049(9) | -0.00032(8) |
| Ba3     | 0.01015(8) | 0.01059(8) | 0.00682(7) | -0.00016(7) | 0.00025(10) | 0.00021(8)  |
| Li1     | 0.014(4)   | 0.015(4)   | 0.012(3)   | 0.009(3)    | 0.004(3)    | 0.007(3)    |
| Li2     | 0.012(4)   | 0.016(4)   | 0.012(3)   | -0.004(3)   | -0.007(3)   | 0.002(3)    |
| Li3     | 0.013(4)   | 0.013(3)   | 0.012(3)   | 0.006(3)    | 0.001(3)    | 0.007(3)    |
| Li4     | 0.016(4)   | 0.013(4)   | 0.018(4)   | 0.002(3)    | 0.004(3)    | 0.007(3)    |
| Li/Al5  | 0.0076(14) | 0.0124(15) | 0.0104(14) | 0.0002(11)  | 0           | 0           |
| Li/Al6  | 0.0084(13) | 0.0034(12) | 0.0108(12) | -0.0013(10) | 0           | 0           |
| Li/Al7  | 0.0054(9)  | 0.0096(9)  | 0.0067(8)  | -0.0018(7)  | 0           | 0           |
| Li/Al8  | 0.010(3)   | 0.005(2)   | 0.012(3)   | 0.001(2)    | 0           | 0           |
| Li/Al9  | 0.029(6)   | 0.003(4)   | 0.028(5)   | 0           | -0.002(4)   | 0           |
| Al10    | 0.0083(7)  | 0.0040(6)  | 0.0067(7)  | 0           | -0.0021(6)  | 0           |
| Li/Al11 | 0.0042(11) | 0.0088(11) | 0.0049(10) | 0           | -0.0015(9)  | 0           |
| Li/Al12 | 0.0095(17) | 0.0147(17) | 0.0103(16) | 0           | 0.0012(13)  | 0           |
| Li/Al13 | 0.0114(18) | 0.0116(17) | 0.0132(18) | 0           | 0           | -0.0004(14) |
| Li/Al14 | 0.0081(11) | 0.0089(11) | 0.0048(10) | 0           | 0           | -0.0025(8)  |
| Li/Al15 | 0.018(4)   | 0.020(4)   | 0.021(4)   | 0           | 0           | -0.004(3)   |
| Li/Al16 | 0.0042(8)  | 0.0070(7)  | 0.0069(7)  | 0           | 0           | 0.0019(6)   |
| O1      | 0.0183(13) | 0.0181(13) | 0.0198(13) | 0.0126(10)  | -0.0035(11) | -0.0037(10) |
| O2      | 0.0090(12) | 0.0091(14) | 0.0089(12) | 0.0002(10)  | -0.0029(10) | -0.0006(10) |
| O3      | 0.028(2)   | 0.031(2)   | 0.0260(19) | -0.0045(15) | -0.0036(15) | 0.0047(15)  |
| O4      | 0.0087(12) | 0.0168(17) | 0.0108(12) | -0.0019(11) | 0.0041(10)  | -0.0012(11) |
| O5      | 0.0087(10) | 0.0076(10) | 0.0193(14) | -0.0027(8)  | 0.0010(13)  | -0.0019(12) |
| O6      | 0.0078(10) | 0.0094(10) | 0.0140(13) | -0.0029(8)  | -0.0009(12) | 0.0018(11)  |
| O7      | 0.0263(18) | 0.0183(16) | 0.0209(16) | -0.0103(13) | 0.0029(14)  | -0.0135(12) |
| O8      | 0.0194(17) | 0.0282(18) | 0.0212(17) | 0.0072(13)  | 0.0139(13)  | 0.0023(13)  |
| O9      | 0.0126(15) | 0.0083(11) | 0.0087(11) | 0.0013(11)  | 0.0013(11)  | 0.0021(9)   |
| O10     | 0.0146(16) | 0.0096(11) | 0.0088(11) | 0.0013(11)  | -0.0019(12) | -0.0033(9)  |
| O11     | 0.0099(13) | 0.0110(13) | 0.0114(13) | -0.0011(14) | 0.0018(17)  | 0.0005(15)  |
| O12     | 0.0096(13) | 0.0084(13) | 0.0093(13) | -0.0023(13) | 0.0000(18)  | 0.0016(15)  |

**Table S3** Selected inter atomic distances (Å) for Li<sub>7</sub>Ba<sub>3</sub>Al<sub>3</sub>O<sub>11</sub>

|                  |           |                  |           |          |           |
|------------------|-----------|------------------|-----------|----------|-----------|
| Ba1—O6           | 2.719(3)  | Ba2—O5           | 2.717(3)  | Ba3—O11  | 2.7296(3) |
| Ba1—O11          | 2.7348(3) | Ba2—O11          | 2.7353(3) | Ba3—O10  | 2.736(3)  |
| Ba1—O4           | 2.743(3)  | Ba2—O9           | 2.738(3)  | Ba3—O2   | 2.744(3)  |
| Ba1—O2           | 2.791(3)  | Ba2—O10          | 2.799(3)  | Ba3—O4   | 2.789(3)  |
| Ba1—O5           | 2.827(3)  | Ba2—O6           | 2.826(3)  | Ba3—O9   | 2.797(3)  |
| Ba1—O1           | 2.975(3)  | Ba2—O7           | 2.970(4)  | Ba3—O8   | 3.010(4)  |
| Ba1—O3           | 3.059(4)  | Ba2—O8           | 3.074(4)  | Ba3—O1   | 3.105(3)  |
| Ba1—O7           | 3.163(3)  | Ba2—O3           | 3.151(4)  | Ba3—O3   | 3.120(4)  |
| Ba1—O8           | 3.240(4)  | □ Ba2—O1         | 3.246(3)  | □ Ba3—O7 | 3.213(4)  |
| Li1—O9           | 1.930(8)  | Li2—O6           | 1.939(8)  |          |           |
| Li1—O5           | 1.945(8)  | Li2—O4           | 1.942(8)  |          |           |
| Li1—O2           | 1.953(8)  | Li2—O9           | 1.951(8)  |          |           |
| Li1—O12          | 2.114(8)  | Li2—O12          | 2.107(8)  |          |           |
| Li3—O2           | 1.922(8)  | Li4—O10          | 1.936(9)  |          |           |
| Li3—O10          | 1.948(8)  | Li4—O4           | 1.939(9)  |          |           |
| Li3—O6           | 1.952(8)  | Li4—O5           | 1.940(9)  |          |           |
| Li3—O12          | 2.108(7)  | Li4—O12          | 2.111(8)  |          |           |
| Li/Al5—O5 (2×)   | 1.839(3)  | Li/Al6—O5 (2×)   | 1.825(3)  |          |           |
| Li/Al5—O1 (2×)   | 1.903(3)  | Li/Al6—O3 (2×)   | 1.879(5)  |          |           |
| Li/Al7—O6 (2×)   | 1.779(3)  | Li/Al8—O6 (2×)   | 1.935(5)  |          |           |
| Li/Al7—O7 (2×)   | 1.808(4)  | Li/Al8—O8 (2×)   | 1.938(5)  |          |           |
| Li/Al9—O7 (2×)   | 1.916(6)  | Al10—O2 (2×)     | 1.763(3)  |          |           |
| Li/Al9—O2 (2×)   | 2.031(8)  | Al10—O1 (2×)     | 1.772(3)  |          |           |
| Li/Al11—O4 (2×)  | 1.810(4)  | Li/Al12—O4 (2×)  | 1.858(4)  |          |           |
| Li/Al11—O3 (2×)  | 1.849(5)  | Li/Al12—O8 (2×)  | 1.923(5)  |          |           |
| Li/Al13—O10 (2×) | 1.863(4)  | Li/Al14—O10 (2×) | 1.807(3)  |          |           |
| Li/Al13—O3 (2×)  | 1.924(5)  | Li/Al14—O7 (2×)  | 1.852(4)  |          |           |
| Li/Al15—O1 (2×)  | 1.925(6)  | Li/Al16—O9 (2×)  | 1.762(3)  |          |           |
| Li/Al15—O9 (2×)  | 2.006(7)  | Li/Al16—O8 (2×)  | 1.775(4)  |          |           |

**Table S4** Crystallographic data of  $\text{Li}_7\text{Ba}_3\text{Al}_3\text{O}_{11}$  derived from Rietveld refinement of powder XRD data

|                                                            |                                                  |
|------------------------------------------------------------|--------------------------------------------------|
| Chemical formula                                           | $\text{Li}_7\text{Ba}_3\text{Al}_3\text{O}_{11}$ |
| Temperature, $T$ (K)                                       | 300(2)                                           |
| Crystal system                                             | Orthorhombic                                     |
| Space group                                                | $Pnnn$ (No.48)                                   |
| Unit-cell dimensions                                       | $a$ (Å) 13.19876(19)                             |
|                                                            | $b$ (Å) 13.21251(19)                             |
|                                                            | $c$ (Å) 13.12913(13)                             |
| Unit-cell volume, $V$ (Å <sup>3</sup> )                    | 2289.57(5)                                       |
| $Z$                                                        | 8                                                |
| Calculated density, $D_{\text{cal}}$ (Mg m <sup>-3</sup> ) | 4.1631(1)                                        |
| Radiation wavelength, $\lambda$ (Å)                        | 1.54059/1.54432                                  |
| $2\theta$ range for data collection (°)                    | 5.0 – 140.0                                      |
| Reflections collected                                      | 5448                                             |
| $R_p$ , $R_{wp}$                                           | 0.0412, 0.0562                                   |
| $R_B$                                                      | 0.01598                                          |

$R_p = \sum |Y_{o,m} - Y_{c,m}| / \sum Y_{o,m}$ ,  $R_{wp} = [\sum w_m (Y_{o,m} - Y_{c,m})^2 / \sum w_m Y_{o,m}^2]^{1/2}$ ,  $w_m = 1/\sigma(Y_{o,m})$ ,  $R_B = \sum |I_{o,k} - I_{c,k}| / \sum I_{o,k}$ , where  $Y_{o,m}$  and  $Y_{c,m}$  are the observed and calculated data, respectively at data point  $m$ ;  $\sigma(Y_{o,m})$  is the error in  $Y_{o,m}$ , and  $I_{o,k}$  and  $I_{c,k}$  are the observed and calculated intensities of the  $k$ th reflection.

**Table S5** Site occupancies, atomic coordinates and isotropic displacement parameters ( $U_{\text{iso}}$ ) refined by Rietveld analysis for the powder XRD pattern of  $\text{Li}_7\text{Ba}_3\text{Al}_3\text{O}_{11}$

| Atom    | Wyckoff site | Occ.         | $x$         | $y$       | $z$         | $U_{\text{iso}}$   |
|---------|--------------|--------------|-------------|-----------|-------------|--------------------|
| Ba1     | 8 <i>m</i>   | 1            | 0.2073(3)   | 0.5016(9) | 0.5011(14)  | 0.811(15)          |
| Ba2     | 8 <i>m</i>   | 1            | 0.0032(8)   | 0.2922(3) | 0.5024(8)   | 0.811 <sup>†</sup> |
| Ba3     | 8 <i>m</i>   | 1            | -0.0007(13) | 0.0014(9) | 0.20786(12) | 0.811 <sup>†</sup> |
| Li1     | 8 <i>m</i>   | 1            | 0.541(6)    | 0.097(7)  | 0.120(7)    | 0.35(8)            |
| Li2     | 8 <i>m</i>   | 1            | 0.41(2)     | 0.10(2)   | 0.095(17)   | 0.35 <sup>‡</sup>  |
| Li3     | 8 <i>m</i>   | 1            | 0.087(19)   | 0.091(17) | 0.587(11)   | 0.35 <sup>‡</sup>  |
| Li4     | 8 <i>m</i>   | 1            | 0.100(14)   | 0.604(15) | 0.093(16)   | 0.35 <sup>‡</sup>  |
| Li/Al5  | 4 <i>l</i>   | 0.532/0.468* | 1/4         | 3/4       | 0.59(1)     | 0.35 <sup>‡</sup>  |
| Li/Al6  | 4 <i>l</i>   | 0.478/0.522* | 1/4         | 3/4       | 0.087(11)   | 0.35 <sup>‡</sup>  |
| Li/Al7  | 4 <i>k</i>   | 0.152/0.848* | 1/4         | 1/4       | 0.586(7)    | 0.35 <sup>‡</sup>  |
| Li/Al8  | 4 <i>k</i>   | 0.857/0.143* | 1/4         | 1/4       | 0.127(5)    | 0.35 <sup>‡</sup>  |
| Li/Al9  | 4 <i>j</i>   | 0.977/0.023* | 3/4         | 0.618(11) | 1/4         | 0.35 <sup>‡</sup>  |
| Al10    | 4 <i>j</i>   | 1            | 3/4         | 0.087(6)  | 1/4         | 0.35 <sup>‡</sup>  |
| Li/Al11 | 4 <i>i</i>   | 0.404/0.596* | 1/4         | 0.596(8)  | 1/4         | 0.35 <sup>‡</sup>  |
| Li/Al12 | 4 <i>i</i>   | 0.614/0.386* | 1/4         | 0.074(8)  | 1/4         | 0.35 <sup>‡</sup>  |
| Li/Al13 | 4 <i>h</i>   | 0.646/0.354* | 0.59(1)     | 1/4       | 3/4         | 0.35 <sup>‡</sup>  |
| Li/Al14 | 4 <i>h</i>   | 0.358/0.642* | 0.074(5)    | 1/4       | 3/4         | 0.35 <sup>‡</sup>  |
| Li/Al15 | 4 <i>g</i>   | 0.947/0.053* | 0.58(2)     | 1/4       | 1/4         | 0.35 <sup>‡</sup>  |
| Li/Al16 | 4 <i>g</i>   | 0.034/0.966* | 0.093(4)    | 1/4       | 1/4         | 0.35 <sup>‡</sup>  |
| O1      | 8 <i>m</i>   | 1            | 0.679(6)    | 0.144(7)  | 0.330(5)    | 0.35 <sup>‡</sup>  |
| O2      | 8 <i>m</i>   | 1            | 0.676(6)    | 0.006(6)  | 0.170(6)    | 0.35 <sup>‡</sup>  |
| O3      | 8 <i>m</i>   | 1            | 0.331(6)    | 0.644(7)  | 0.161(6)    | 0.35 <sup>‡</sup>  |
| O4      | 8 <i>m</i>   | 1            | 0.325(7)    | 0.0030(9) | 0.176(7)    | 0.35 <sup>‡</sup>  |
| O5      | 8 <i>m</i>   | 1            | 0.173(6)    | 0.671(6)  | 0.007(6)    | 0.35 <sup>‡</sup>  |
| O6      | 8 <i>m</i>   | 1            | 0.173(6)    | 0.171(6)  | 0.495(6)    | 0.35 <sup>‡</sup>  |
| O7      | 8 <i>m</i>   | 1            | 0.172(7)    | 0.334(6)  | 0.667(5)    | 0.35 <sup>‡</sup>  |
| O8      | 8 <i>m</i>   | 1            | 0.164(7)    | 0.168(7)  | 0.159(5)    | 0.35 <sup>‡</sup>  |
| O9      | 8 <i>m</i>   | 1            | -0.003(8)   | 0.326(5)  | 0.170(5)    | 0.35 <sup>‡</sup>  |
| O10     | 8 <i>m</i>   | 1            | -0.004(9)   | 0.666(4)  | 0.185(4)    | 0.35 <sup>‡</sup>  |
| O11     | 4 <i>f</i>   | 1            | 0           | 0         | 0           | 0.35 <sup>‡</sup>  |
| O12     | 4 <i>e</i>   | 1            | 1/2         | 1/2       | 1/2         | 0.35 <sup>‡</sup>  |

\* The values were fixed with the occupancies shown in Table S1.

<sup>†</sup>  $U_{\text{iso}}$  was constrained with  $U_{\text{iso}}$  of Ba1.

<sup>‡</sup>  $U_{\text{iso}}$  was constrained with  $U_{\text{iso}}$  of Li1.

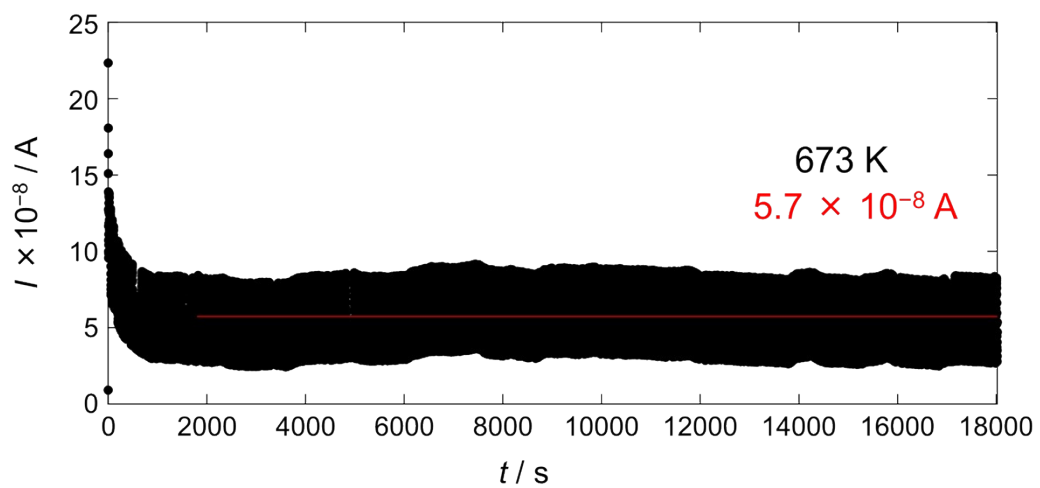

**Fig. S1** Current versus time measured with Ni plate electrodes (0.1 mm thick) under an applied voltage of 5V for the polycrystalline sample of  $\text{Li}_7\text{Ba}_3\text{Al}_3\text{O}_{11}$  in an Ar-filled glove box at 673 K.
